# Supplementary material for: Induced and natural variation of promoter length modulates the photoperiodic response of FLOWERING LOCUS T
Source: PubMed Central journal article supplement — Nat Commun. 2014 Aug 4;5:4558. doi: 10.1038/ncomms5558 (PMC4143923; doi:10.1038/ncomms5558), 2014-08-04
Supplement: ncomms5558-s1.pdf [file ncomms5558-s1.pdf]

**Supplementary Figures and Tables**

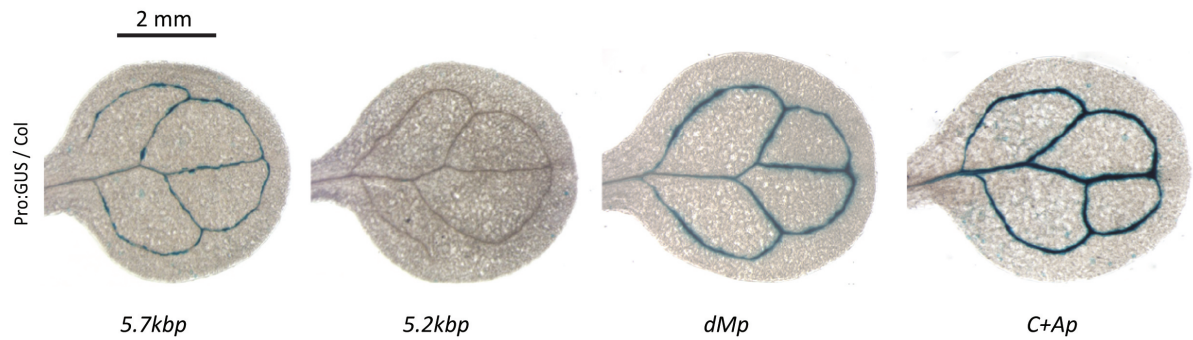

**Supplementary Figure 1.** Histochemical localization of GUS activity in cotyledons of transgenic *Col-0* expressing the *GUS* reporter gene under the control of *FT* promoters as indicated. Leaves were collected at ZT 16 after growth for 12 LDs on GM media.

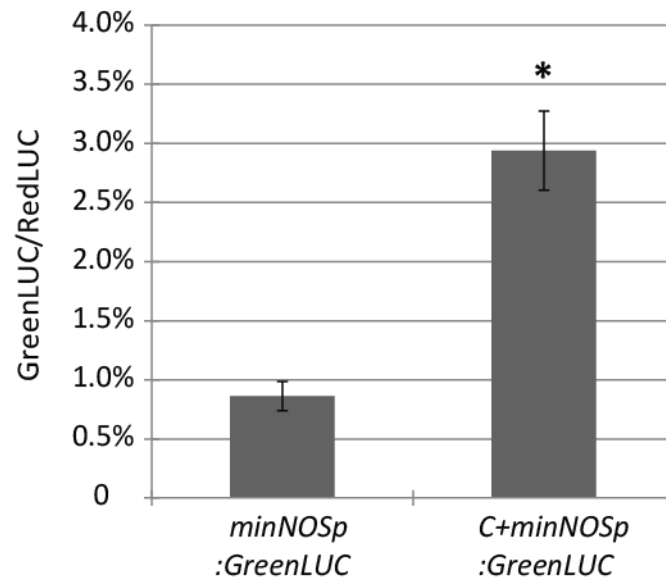

**Supplementary Figure 2. *Block C* enhances a minimal promoter in transient assays**

*Block C* fused to *NOSminp* drives reporter gene *GreenLUC* expression in transient leaf bombardment assays. *35S::RedLUC* co-bombarded with *promoter::GreenLUC* was used as the internal control. Values represent mean  $\pm$  SE. The asterisk (\*) indicates statistically significant differences relative to the control *NOSmin::GreenLUC*. Statistical significance was determined using the Student's t-test ( $p < 0.01$ ).

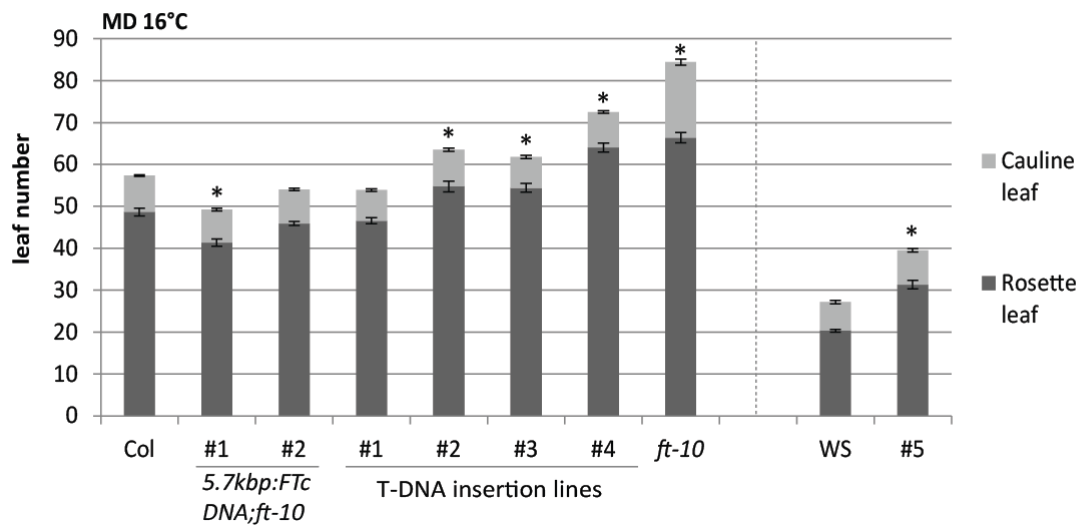

**Supplementary Figure 3. Flowering time of T-DNA insertion lines under MDs conditions.**

Flowering time was measured in marginal long day (MD) grown *Arabidopsis* plants carrying T-DNA insertions either upstream (#1) of *Block C* or between *Block C* and the *Block A* (#2-#5) at positions indicated by triangles in Fig.2a. Line #5 is *Ws* and all other lines in the *Col-0* accession. Number of rosette and cauline leaves are shown as mean  $\pm$  SE. The asterisk (\*) indicates statistically significant differences relative to the control *Col* or *Ws* as indicated. Statistical significance was determined using the Student's t-test ( $p < 0.01$ ).

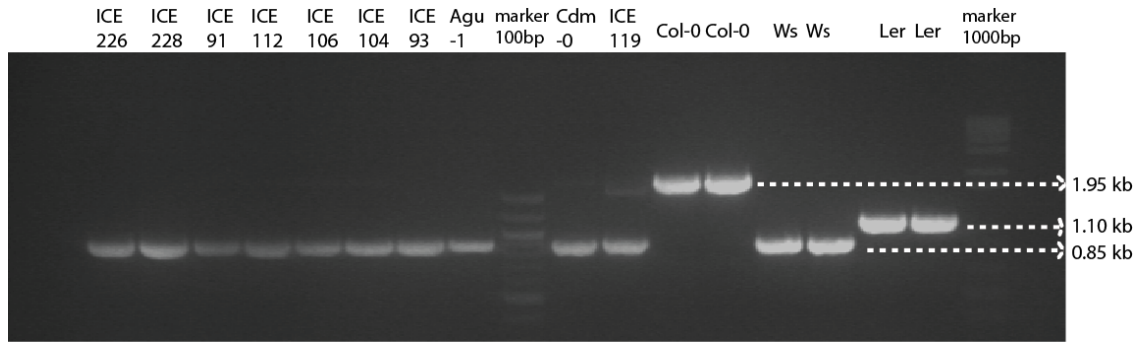

**Supplementary Figure 4. Three types of *FT* promoters.** DNA was isolated from 13 *Arabidopsis* accessions and amplified by primer pair 12\_forward and 13\_reverse. The expected product 1.95 kb, 1.10 kb and 0.85 kb for “long”, “medium” and “short” promoters, respectively. PCR products were loaded on 1% agarose gel.

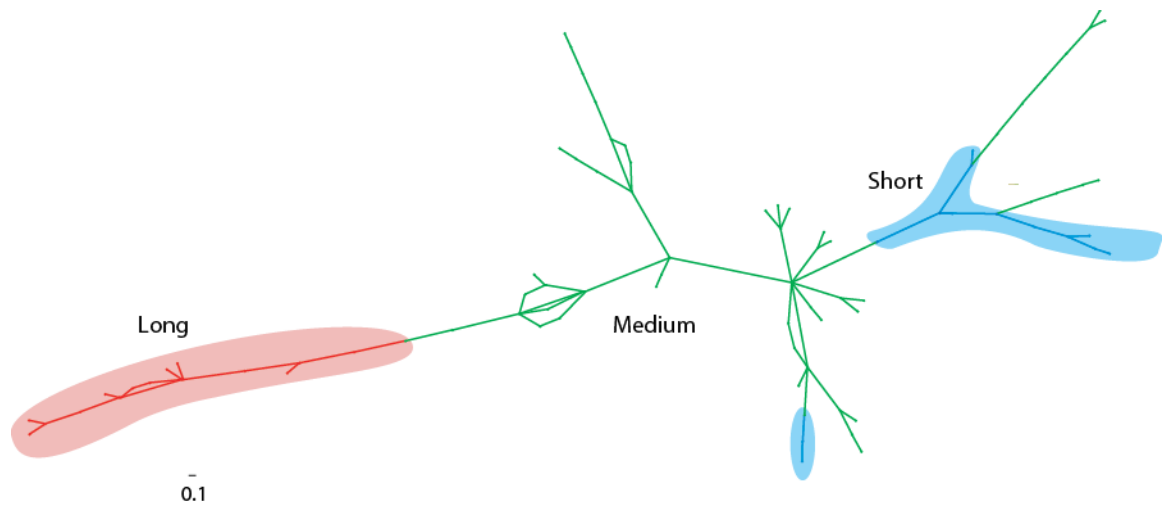

**Supplementary Figure 5. Median-joining network of the *FT* haplotypes.** The blue, green and red colour of the branches and shading corresponds, respectively, to the clades of the short, medium and long *FT* promoter regions. Scale bar, 0.1 nucleotide substitutions per site.

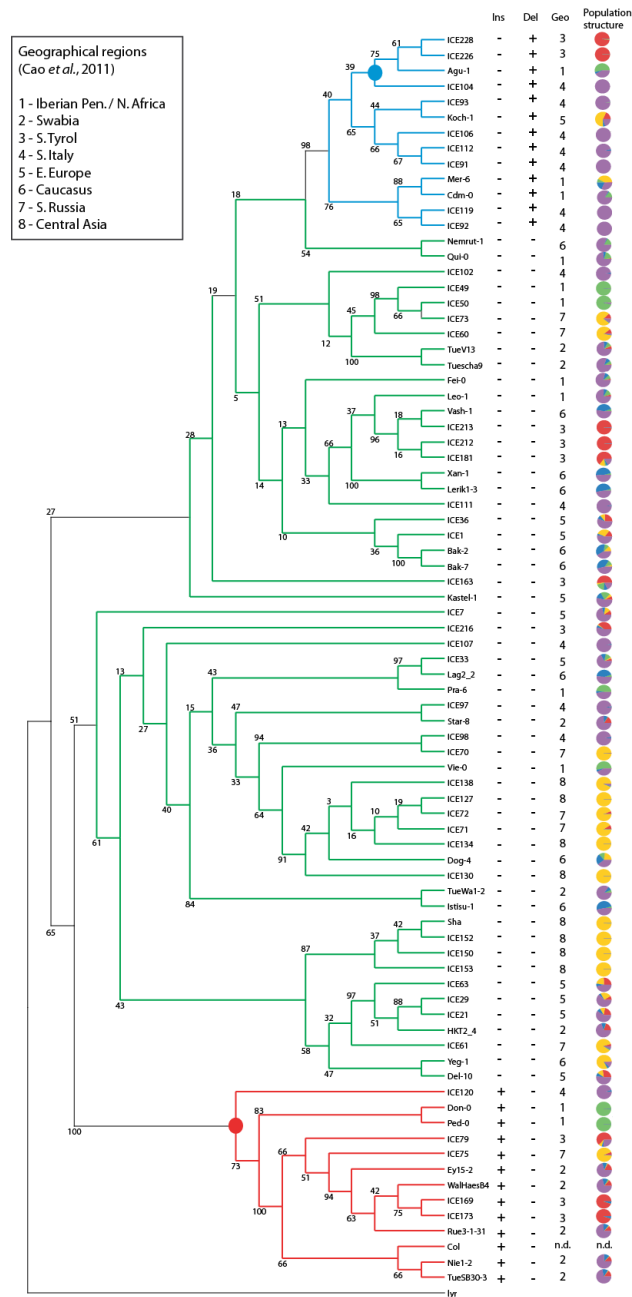

**Supplementary Figure 6. SNP-based maximum-likelihood phylogeny of the coding and promoter regions of *FT* from 81 *Arabidopsis* accessions.** Blue, green and red colour of the branches indicates clades of the short, medium and long *FT* promoters, respectively. The *FT* sequence from *A. lyrata* was used as outgroup. Bootstrap values (%) are shown at the nodes. Filled ellipse pictograms denote sub-clades with the footprints of selection defined as the retention of the phylogenetically close *FT* haplotypes within the genetically divergent genotypes. “Ins”, “Del” and “Geo” columns describe, respectively, distribution of the insertion and deletion in the *FT* promoter region (see Fig. 4a) and geographical origin of the genotypes. Coloured pie charts illustrate population structure of the genotypes determined by genome-wide analysis<sup>1</sup>. n.d. means no data.

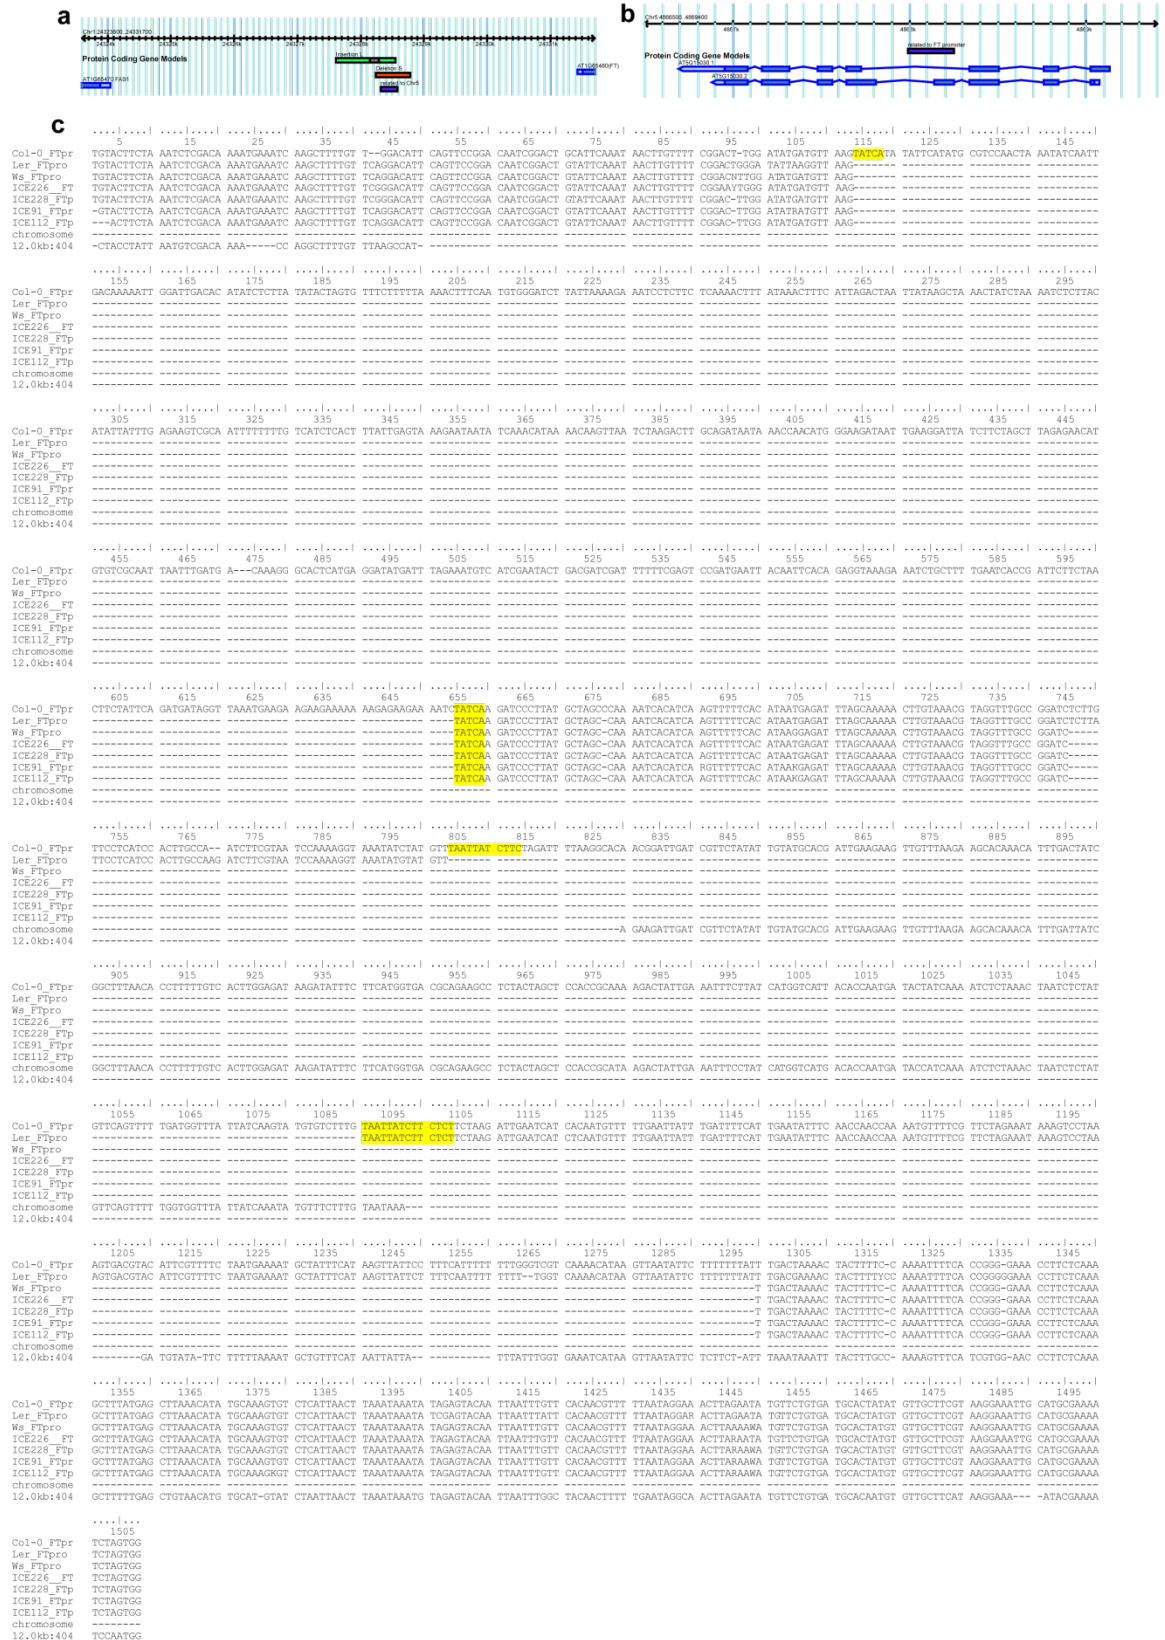

**Supplementary Figure 7. Structural variation at the FT promoter**

**a**, location and structure of “long”, “medium” and “short” FT promoter types. The long FT promoter type, corresponding to the reference genome Col, contains two insertions (green

boxes) interrupted by a regions shared with the “medium” type (gray box). The short promoter does not contain any of the additional sequence found in the “long” promoter and carries a further deletion of the sequence shared between “long” and “medium” (red box). The proximal half of the insertion is related to a sequence on chromosome 5 (blue box, 97% sequence identity).

**b, location of the duplicated fragment from the *FT* promoter on chromosome 5.**

**c, alignment of polymorphic region between “long”, “medium” and “short” *FT* promoter types.** Yellow boxes indicate the presumed target site insertions in Col-0. The *FT* homologous sequence from chromosome 5 and the *Arabidopsis lyrata* sequence is included in the alignment.



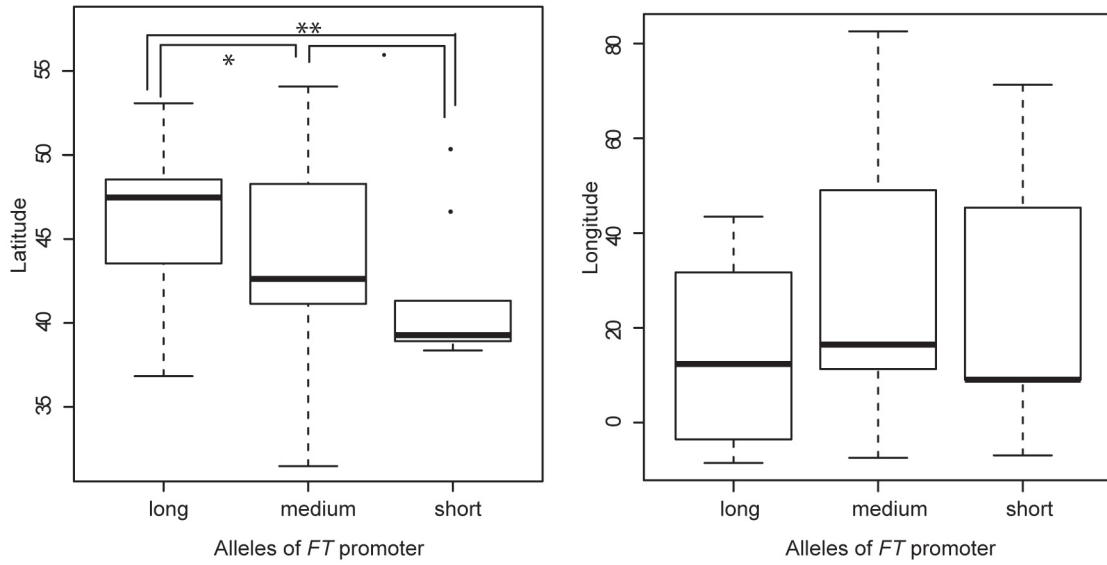

**Supplementary Figure 8. Association of variation in the *FT* promoter with geographic coordinates.** Boxplots of the latitudinal and longitudinal distribution of three *FT* promoter types as indicated.<sup>1</sup> Significance codes:  $p < 0.01 = **$ ,  $p < 0.05 = *$ ,  $p < 0.1 = .$ . Long  $n = 12$ , medium  $n = 55$ , short  $n = 13$ . See Supplementary table 2 and Supplementary dataset 1 for statistical tests.

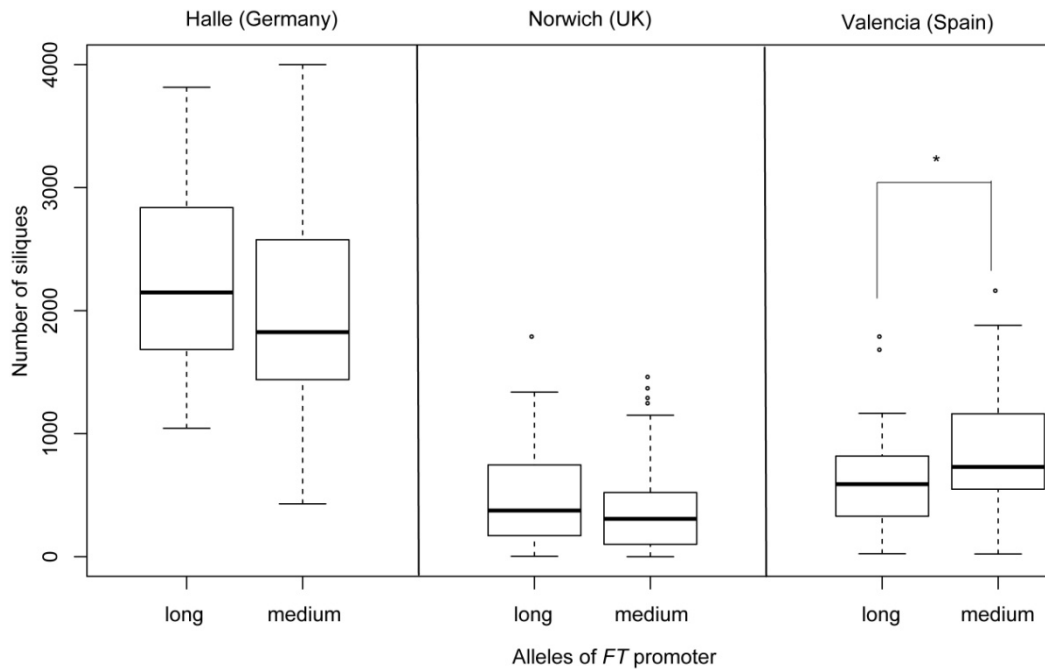

**Supplementary Figure 9. Variation in *FT* promoter length explains fitness variation of *Arabidopsis* accessions grown in Spain but not Halle or Norwich.** Common garden experiments performed by Fournier-Level et al. 2011<sup>2</sup> at four different European sites were re-analyzed for 82 accessions for which the *FT* promoter type was confirmed by PCR and for which high density SNP data were available<sup>3</sup>. The medium version of *FT* promoter slightly outperforms the long version at the Spanish site based on the number of siliques produced by plant but not at two other sites (See Supplementary table 5 and Supplementary dataset 3 for statistical tests). Note that the short *FT* promoter type is intentionally removed from the graphs as only three accessions showing this genotype had been included in the study. Data from an experiment performed in Oulu, Finland were excluded from the analysis because most plants did not survive to seed set.

**Supplementary Table 1**

| Analysis of differences in latitudinal and longitudinal distribution considering population structure k=5 determined by STRUCTURE |          |            |         |              |
|-----------------------------------------------------------------------------------------------------------------------------------|----------|------------|---------|--------------|
| ## Associations with latitude                                                                                                     |          |            |         |              |
| glm(formula = latitude ~ FTprom + IAP1 + IAP2 + IAP3 + IAP4)                                                                      |          |            |         |              |
| Compare to medium promoter                                                                                                        |          |            |         |              |
|                                                                                                                                   | Estimate | Std. Error | t value | Pr(> t )     |
| (Intercept)                                                                                                                       | 43.055   | 1.046      | 41.155  | < 2e-16 ***  |
| FT long                                                                                                                           | 2.777    | 1.284      | 2.163   | 0.033829 *   |
| FT short                                                                                                                          | -2.232   | 1.325      | -1.684  | 0.096389 .   |
| IAP1                                                                                                                              | 4.735    | 1.785      | 2.653   | 0.009782 **  |
| IAP2                                                                                                                              | 5.585    | 1.461      | 3.824   | 0.000274 *** |
| IAP3                                                                                                                              | -7.603   | 2.089      | -3.639  | 0.000508 *** |
| IAP4                                                                                                                              | -4.162   | 4.248      | -0.980  | 0.330414     |
| Compare to long promoter                                                                                                          |          |            |         |              |
| (Intercept)                                                                                                                       | 45.832   | 1.422      | 32.229  | < 2e-16 ***  |
| FT medium                                                                                                                         | -2.777   | 1.284      | -2.163  | 0.033839 *   |
| FT short                                                                                                                          | -5.010   | 1.604      | -3.123  | 0.002568 **  |
| IAP1                                                                                                                              | 4.735    | 1.785      | 2.653   | 0.009782 **  |
| IAP2                                                                                                                              | 5.585    | 1.461      | 3.824   | 0.000274 *** |
| IAP3                                                                                                                              | -7.603   | 2.089      | -3.639  | 0.000508 *** |
| IAP4                                                                                                                              | -4.162   | 4.248      | -0.980  | 0.330415     |
| Associations with longitude                                                                                                       |          |            |         |              |
| glm(formula = longitude ~ FTprom + IAP1 + IAP2 + IAP3 + IAP4)                                                                     |          |            |         |              |
| compare to medium promoter                                                                                                        |          |            |         |              |
| (Intercept)                                                                                                                       | 6.4171   | 2.2604     | 2.839   | 0.00586 **   |
| FT long                                                                                                                           | -3.4560  | 2.7747     | -1.246  | 0.21692      |
| FT short                                                                                                                          | 2.3017   | 2.8637     | 0.804   | 0.42414      |
| IAP1                                                                                                                              | 0.5146   | 3.8562     | 0.133   | 0.89420      |
| IAP2                                                                                                                              | 61.8686  | 3.1557     | 19.605  | < 2e-16 ***  |
| IAP3                                                                                                                              | -14.9889 | 4.5143     | -3.320  | 0.00141 **   |
| IAP4                                                                                                                              | 86.1141  | 9.1774     | 9.383   | 3.57e-14 *** |
| Compare to long promoter                                                                                                          |          |            |         |              |
| (Intercept)                                                                                                                       | 2.9612   | 3.0725     | 0.964   | 0.33835      |
| FT medium                                                                                                                         | 3.4560   | 2.7747     | 1.246   | 0.21692      |
| FT short                                                                                                                          | 5.7577   | 3.4663     | 1.661   | 0.10099      |
| IAP1                                                                                                                              | 0.5146   | 3.8562     | 0.133   | 0.89420      |
| IAP2                                                                                                                              | 61.8686  | 3.1557     | 19.605  | < 2e-16 ***  |
| IAP3                                                                                                                              | -14.9889 | 4.5143     | -3.320  | 0.00141 **   |
| IAP4                                                                                                                              | 86.1141  | 9.1774     | 9.383   | 3.57e-14 *** |
| Signif. codes: 0 '***' 0.001 '**' 0.01 '*' 0.05 '.' 0.1 ' ' 1                                                                     |          |            |         |              |

**Supplementary Table 1.** Differences in longitudinal and latitudinal distribution of *FT*

promoter types were tested by calculating a general linear model that included an estimate of the population structure based on k=5 clusters that was previously determined<sup>1</sup>. The data used for the analysis are compiled as dataset 1. The model was calculated in R using the function `glm` (see Supplementary dataset 1).

**Supplementary Table 2 F1 hybrids for pyro-sequencing**

| Crosses   | SNPs | Promoter types |
|-----------|------|----------------|
| An-1XCol  | GXC  | MXL            |
| LerXTs-1  | CXG  | MXL            |
| ColXC24   | CXG  | LXS            |
| ColXWs    | CXG  | LXS            |
| LerXC24   | CXG  | MXS            |
| LerXBr-0  | CXG  | MXS            |
| LerXWs    | CXG  | MXS            |
| An-1XCvi  | GXC  | MXM            |
| An-1XLer  | GXC  | MXM            |
| CviXKyo   | CXG  | MXM            |
| LerXKyo   | CXG  | MXM            |
| ShaXLer   | GXC  | MXM            |
| LerXRRS7  | CXG  | MXM            |
| LerXGot-7 | CXG  | MXM            |

**Supplementary Table 3**

| ##for the Fallwinter cohort                                                                                                                                                                                          |           |            |         |              |
|----------------------------------------------------------------------------------------------------------------------------------------------------------------------------------------------------------------------|-----------|------------|---------|--------------|
| glm(formula = log(Fall\$Seedmass) ~ Fall\$preFTgeno + Fall\$FRIG + Fall\$PC1 + Fall\$PC2 + Fall\$PC3 + Fall\$PC4 + Fall\$PC5 + Fall\$PC6 + Fall\$PC7 + Fall\$PC8 + Fall\$PC9 + Fall\$PC10)                           |           |            |         |              |
|                                                                                                                                                                                                                      | Estimate  | Std. Error | t value | Pr(> t )     |
| (Intercept)                                                                                                                                                                                                          | 5.99579   | 0.82667    | 7.253   | 1.45e-09 *** |
| Fall\$preFTgenom                                                                                                                                                                                                     | -0.62938  | 0.24464    | -2.573  | 0.0128 *     |
| Fall\$preFTgenos                                                                                                                                                                                                     | -0.27941  | 0.51181    | -0.546  | 0.5873       |
| Fall\$FRIGN                                                                                                                                                                                                          | 0.45137   | 0.32342    | 1.396   | 0.1684       |
| Fall\$PC1                                                                                                                                                                                                            | -6.26295  | 7.23199    | -0.866  | 0.3902       |
| Fall\$PC2                                                                                                                                                                                                            | -1.61701  | 0.97815    | -1.653  | 0.1040       |
| Fall\$PC3                                                                                                                                                                                                            | 0.37635   | 1.08943    | 0.345   | 0.7311       |
| Fall\$PC4                                                                                                                                                                                                            | 3.01602   | 1.35699    | 2.223   | 0.0304 *     |
| Fall\$PC5                                                                                                                                                                                                            | 1.05982   | 1.19048    | 0.890   | 0.3772       |
| Fall\$PC6                                                                                                                                                                                                            | 0.70891   | 0.95464    | 0.743   | 0.4609       |
| Fall\$PC7                                                                                                                                                                                                            | 0.55376   | 1.10459    | 0.501   | 0.6181       |
| Fall\$PC8                                                                                                                                                                                                            | 1.35789   | 1.08555    | 1.251   | 0.2163       |
| Fall\$PC9                                                                                                                                                                                                            | -0.22992  | 0.89966    | -0.256  | 0.7992       |
| Fall\$PC10                                                                                                                                                                                                           | -0.09429  | 0.92774    | -0.102  | 0.9194       |
| ##for the Spring cohort                                                                                                                                                                                              |           |            |         |              |
| glm(formula = log(Spring\$Seedmass) ~ Spring\$preFTgeno + Spring\$FRIG + Spring\$PC1 + Spring\$PC2 + Spring\$PC3 + Spring\$PC4 + Spring\$PC5 + Spring\$PC6 + Spring\$PC7 + Spring\$PC8 + Spring\$PC9 + Spring\$PC10) |           |            |         |              |
| (Intercept)                                                                                                                                                                                                          | 5.233360  | 0.428988   | 12.199  | <2e-16 ***   |
| Spring\$preFTgenom                                                                                                                                                                                                   | 0.112398  | 0.116339   | 0.966   | 0.3374       |
| Spring\$preFTgenos                                                                                                                                                                                                   | 0.335794  | 0.263601   | 1.274   | 0.2070       |
| Spring\$FRIGN                                                                                                                                                                                                        | 0.007736  | 0.154601   | 0.050   | 0.9602       |
| Spring\$PC1                                                                                                                                                                                                          | -6.263512 | 3.748539   | -1.671  | 0.0993 .     |
| Spring\$PC2                                                                                                                                                                                                          | 0.275107  | 0.481551   | 0.571   | 0.5697       |
| Spring\$PC3                                                                                                                                                                                                          | 0.108806  | 0.442340   | 0.246   | 0.8064       |
| Spring\$PC4                                                                                                                                                                                                          | 0.202776  | 0.517725   | 0.392   | 0.6965       |
| Spring\$PC5                                                                                                                                                                                                          | -0.137650 | 0.487851   | -0.282  | 0.7787       |
| Spring\$PC6                                                                                                                                                                                                          | 0.064956  | 0.430631   | 0.151   | 0.8805       |
| Spring\$PC7                                                                                                                                                                                                          | -0.097047 | 0.440441   | -0.220  | 0.8263       |
| Spring\$PC8                                                                                                                                                                                                          | -0.667620 | 0.432254   | -1.545  | 0.1271       |
| Spring\$PC9                                                                                                                                                                                                          | -0.538175 | 0.452742   | -1.189  | 0.2387       |
| Spring\$PC10                                                                                                                                                                                                         | -0.543723 | 0.448564   | -1.212  | 0.2297       |
| Signif. codes: 0 '***' 0.001 '**' 0.01 '*' 0.05 '.' 0.1 ' ' 1                                                                                                                                                        |           |            |         |              |

**Supplementary Table 3. Statistical test of the association of *FT* promoter types with**

**seed mass during two growth seasons.** A general linear regression model was applied to the common garden experiments performed by Korves et al. 2007<sup>4</sup> using the `glm` function in R. In this model, `Seedmass` is log transformed data taken from Korves et al. 2007<sup>4</sup> after fitting a model that considered average weight of seeds per silique, average number of siliques per plant and survival rate, `preFTgeno` is the *FT* promoter type (l:long, m:medium and s:small), `season` was classified as `spring` and `fall`, `FRIG` is the functionality of *FRIGIDA* (Functional F and non-functional N), `PC1` to `10` are the first 10 principal coordinates, which are used for controlling the population structure based on available high density SNP data<sup>3</sup> (see Supplementary dataset 2).

Supplementary Table 4

| ##For the Fallwinter season:                                                                                                                                                                                                      |           |            |         |              |
|-----------------------------------------------------------------------------------------------------------------------------------------------------------------------------------------------------------------------------------|-----------|------------|---------|--------------|
| glm(formula = Fall\$DTB ~ Fall\$preFTgeno + Fall\$FRIG + Fall\$PC1 + Fall\$PC2 + Fall\$PC3 + Fall\$PC4 + Fall\$PC5 + Fall\$PC6 + Fall\$PC7 + Fall\$PC8 + Fall\$PC9 + Fall\$PC10, family = quasipoisson)                           |           |            |         |              |
|                                                                                                                                                                                                                                   | Estimate  | Std. Error | t value | Pr(> t )     |
| (Intercept)                                                                                                                                                                                                                       | 5.136333  | 0.140026   | 36.681  | <2e-16 ***   |
| Fall\$preFTgenom                                                                                                                                                                                                                  | 0.007178  | 0.043009   | 0.167   | 0.8680       |
| Fall\$preFTgenos                                                                                                                                                                                                                  | -0.118274 | 0.091951   | -1.286  | 0.2035       |
| Fall\$FRIGN                                                                                                                                                                                                                       | -0.016839 | 0.055719   | -0.302  | 0.7636       |
| Fall\$PC1                                                                                                                                                                                                                         | -0.658018 | 1.221432   | -0.539  | 0.5922       |
| Fall\$PC2                                                                                                                                                                                                                         | 0.424880  | 0.170754   | 2.488   | 0.0158 *     |
| Fall\$PC3                                                                                                                                                                                                                         | -0.168450 | 0.166629   | -1.011  | 0.3163       |
| Fall\$PC4                                                                                                                                                                                                                         | 0.095647  | 0.190297   | 0.503   | 0.6172       |
| Fall\$PC5                                                                                                                                                                                                                         | 0.307632  | 0.190908   | 1.611   | 0.1126       |
| Fall\$PC6                                                                                                                                                                                                                         | 0.003413  | 0.151900   | 0.022   | 0.9822       |
| Fall\$PC7                                                                                                                                                                                                                         | 0.015666  | 0.166154   | 0.094   | 0.9252       |
| Fall\$PC8                                                                                                                                                                                                                         | -0.074107 | 0.161556   | -0.459  | 0.6482       |
| Fall\$PC9                                                                                                                                                                                                                         | 0.022186  | 0.156163   | 0.142   | 0.8875       |
| Fall\$PC10                                                                                                                                                                                                                        | 0.104390  | 0.158945   | 0.657   | 0.5140       |
| ##For the Spring season:                                                                                                                                                                                                          |           |            |         |              |
| glm(formula = Spring\$DTB ~ Spring\$preFTgeno + Spring\$FRIG + Spring\$PC1 + Spring\$PC2 + Spring\$PC3 + Spring\$PC4 + Spring\$PC5 + Spring\$PC6 + Spring\$PC7 + Spring\$PC8 + Spring\$PC9 + Spring\$PC10, family = quasipoisson) |           |            |         |              |
|                                                                                                                                                                                                                                   | Estimate  | Std. Error | t value | Pr(> t )     |
| (Intercept)                                                                                                                                                                                                                       | 4.809868  | 0.032410   | 148.407 | < 2e-16 ***  |
| Spring\$preFTgenom                                                                                                                                                                                                                | 0.007481  | 0.008799   | 0.850   | 0.398151     |
| Spring\$preFTgenos                                                                                                                                                                                                                | -0.013654 | 0.020054   | -0.681  | 0.498280     |
| Spring\$FRIGN                                                                                                                                                                                                                     | -0.040353 | 0.011640   | -3.467  | 0.000918 *** |
| Spring\$PC1                                                                                                                                                                                                                       | -0.156569 | 0.283547   | -0.552  | 0.582637     |
| Spring\$PC2                                                                                                                                                                                                                       | 0.184250  | 0.036533   | 5.043   | 3.62e-06 *** |
| Spring\$PC3                                                                                                                                                                                                                       | -0.059973 | 0.033450   | -1.793  | 0.077436 .   |
| Spring\$PC4                                                                                                                                                                                                                       | -0.089806 | 0.039241   | -2.289  | 0.025216 *   |
| Spring\$PC5                                                                                                                                                                                                                       | -0.087145 | 0.036885   | -2.363  | 0.021013 *   |
| Spring\$PC6                                                                                                                                                                                                                       | 0.044995  | 0.033050   | 1.361   | 0.177880     |
| Spring\$PC7                                                                                                                                                                                                                       | -0.113094 | 0.033545   | -3.371  | 0.001237 **  |
| Spring\$PC8                                                                                                                                                                                                                       | -0.023654 | 0.032680   | -0.724  | 0.471664     |
| Spring\$PC9                                                                                                                                                                                                                       | -0.013980 | 0.034163   | -0.409  | 0.683655     |
| Spring\$PC10                                                                                                                                                                                                                      | 0.019985  | 0.033983   | 0.588   | 0.558416     |
| Signif. codes: 0 '***' 0.001 '**' 0.01 '*' 0.05 '.' 0.1 ' ' 1                                                                                                                                                                     |           |            |         |              |

**Supplementary Table 4. Statistical test of the association of *FT* promoter types with days to bolting (DTB).** Bolting time data from the study of Korves et al., 2007<sup>4</sup> was treated as count data. A glm regression model was applied to the data with quasipoisson correction for the overdispersion of the data. Analysis was done following the suggestions of Crawley (2005)<sup>5</sup>.

**Supplementary Table 5**

| glm (formula = SilNb ~ proFTgeno + location + FRIG + PC1 + PC2 + PC3 + PC4 + PC5 + PC6 + PC7 + PC8 + PC9 + PC10 + proFTgeno:location + location:FRIG, family = quasipoisson). |          |            |         |             |
|-------------------------------------------------------------------------------------------------------------------------------------------------------------------------------|----------|------------|---------|-------------|
|                                                                                                                                                                               | Estimate | Std. Error | t-value | Pr(> t )    |
| (Intercept)                                                                                                                                                                   | 7.34536  | 0.31716    | 23.160  | <2e-16 ***  |
| proFTgenoM                                                                                                                                                                    | -0.1159  | 0.10909    | -1.063  | 0.28890     |
| proFTgenoS                                                                                                                                                                    | -0.08868 | 0.22065    | -0.402  | 0.68817     |
| locationNorw                                                                                                                                                                  | -1.40604 | 0.19307    | -7.282  | 6.33e-12*** |
| locationValen                                                                                                                                                                 | -1.17363 | 0.17091    | -6.867  | 7.14e-11*** |
| FRIGN                                                                                                                                                                         | 0.17493  | 0.10754    | 1.627   | 0.10528     |
| PC1                                                                                                                                                                           | -2.62194 | 2.80872    | -0.933  | 0.35162     |
| PC2                                                                                                                                                                           | -1.29656 | 0.29857    | -4.343  | 2.18e-05*** |
| PC3                                                                                                                                                                           | -0.37570 | 0.40119    | -0.936  | 0.35010     |
| PC4                                                                                                                                                                           | 1.09566  | 0.37976    | 2.885   | 0.00432 **  |
| PC5                                                                                                                                                                           | -0.4752  | 0.31718    | -1.498  | 0.13553     |
| PC6                                                                                                                                                                           | 0.47380  | 0.36127    | 1.311   | 0.19111     |
| PC7                                                                                                                                                                           | 0.21856  | 0.35759    | 0.611   | 0.54173     |
| PC8                                                                                                                                                                           | -1.43248 | 0.35043    | -4.088  | 6.18e-05*** |
| PC9                                                                                                                                                                           | -0.13306 | 0.34375    | -0.387  | 0.69908     |
| PC10                                                                                                                                                                          | 0.24461  | 0.29238    | 0.837   | 0.40373     |
| proFTgenoM:locationNorw                                                                                                                                                       | -0.07774 | 0.21824    | -0.356  | 0.72205     |
| proFTgenoS:locationNorw                                                                                                                                                       | 0.03069  | 0.49296    | 0.062   | 0.95041     |
| proFTgenoM:locationValen                                                                                                                                                      | 0.42046  | 0.18407    | 2.284   | 0.02335 *   |
| proFTgenoS:locationValen                                                                                                                                                      | -0.26176 | 0.49313    | -0.531  | 0.59609     |
| locationNorw:FRIGN                                                                                                                                                            | -0.30175 | 0.20633    | -1.462  | 0.14509     |
| locationValen:FRIGN                                                                                                                                                           | -0.20970 | 0.16250    | -1.290  | 0.19829     |
| Signif. codes: 0 '***' 0.001 '**' 0.01 '*' 0.05 '.' 0.1 ' ' 1                                                                                                                 |          |            |         |             |

**Supplementary Table 5. Statistical test of the association of *FT* promoter types with**

**silique number.** Silique number as measure of fitness was taken from a field study performed Fournier-Level et al 2011 at 3 different European sites<sup>2</sup>. Silique number treated as count data in a glm regression model. Quasipoisson correction was applied to account for the overdispersion of the count data. Analysis was done following the suggestion of Crawley (2005)<sup>5</sup>. In this model, SilNb is the silique number, proFTgeno are the *FT* promoter length types (long (L), medium (M), small (S)), location corresponds to three experimental sites, FRIG is the functionality of FRIGIDA<sup>4</sup>, PC1 to 10 are the first 10 principal coordinates according to published high density SNP data<sup>3</sup>, which are used for controlling the population structure (see Supplementary dataset 3).

Since removing location:FRIG from the model resulted in slightly different results (p=0.09), we kept it as parameter in the final model. Note a significant difference between proFTgeno L and M at the Valencia site. This difference was also mildly supported by a non-parametric Wilcoxon rank sum test (p=0.06).

**Supplementary Table 6. List of oligonucleotides used in this study.**

| Purpose                  | Primer name        | Primer name                                           |
|--------------------------|--------------------|-------------------------------------------------------|
| Plasmid construction     | 5.2kbFTp-GW-FW     | GGGGACAAGTTTGTACAAAAAAGCAGGCTTCGATTGTTTACACTACTTCC    |
|                          | 1kbFTp-GW-RE       | GGGGACCACTTTGTACAAGAAAGCTGGGTCTTTGATCTTGAACAAACAGGT   |
|                          | BlockC-GW-FW       | GGGGACAAGTTTGTACAAAAAAGCAGGCTCATTGCTGAACAAAAATCT      |
|                          | BlockC-GW-RE       | GGGGACCACTTTGTACAAGAAAGCTGGGTAAACGTTTGGAAATAGGAAGTATG |
|                          | BlockC-overlapA-RE | GTACCGCCAAAAACGTTTGGAAATAGGAAGTATG                    |
|                          | BlockA-overlapC-FW | TTCCAAACGTTTTTGGCGGTACCCTACTTTT                       |
| Genotyping               | ft10_GABI_RP       | CAGGTTCAAAACAAGCCAAGA                                 |
|                          | ft10_GABI_LB       | CCCATTTGACGTGAATGTAGACAC                              |
|                          | LBb1.3             | ATTTTGCCGATTTCCGGAAC                                  |
|                          | 12 forward         | CAACGAGATTTGGGGTTAAG                                  |
|                          | 13 reverse         | GATGCATTGTTTAAGAAAATCAGG                              |
| Gene expression analysis | FT cDNA RT fw      | GGTGGAGAAGACCTCAGGAA                                  |
|                          | FT cDNA RT re      | ACCCTGGTGCATACACTGTT                                  |
|                          | PP2A-RT-fw         | AAATACGCCCAACGAACAAA                                  |
|                          | PP2A-RT-re         | CAGCAACGAATTGTGTTTGG                                  |
| Pyro-sequencing          | F1                 | TGTGTGTTACGAAAATCCAAGTCC                              |
|                          | R1                 | (Bio)AGCCACTCTCCCTCTGACAATT                           |
|                          | S1                 | GTTTCGACAGCTTGG                                       |
| 3C                       | Primer1            | CCATCTTCCCACTCCCTTCT                                  |
|                          | Primer2            | TGGAAGTGGAAATGAATGTTAGG                               |
|                          | Primer3            | TGTTGGCCAAGATGTCTCAC                                  |
|                          | Primer4            | TGTTCCCATGTGTGTGTGTG                                  |
|                          | Primer5            | TTGAATGCAGTCCGATTGTC                                  |
|                          | Primer6            | AAAAATTGCGACTTCTCAAATAA                               |
|                          | Primer7            | TCTGCGTCACCATGAAGAAA                                  |
|                          | Primer8            | GCCACTGTTCTACACGTCCA                                  |
|                          | Primer9            | AAAATTTCGAAAGCGAAAACG                                 |
|                          | Primer10           | GGAACAAAGAAAAATCCCAAGA                                |



### Supplementary References

1. Cao J, *et al.* Whole-genome sequencing of multiple *Arabidopsis thaliana* populations. *Nat Genet* **43**, 956-963 (2011).
2. Fournier-Level A, Korte A, Cooper MD, Nordborg M, Schmitt J, Wilczek AM. A map of local adaptation in *Arabidopsis thaliana*. *Science* **334**, 86-89 (2011).
3. Atwell S, *et al.* Genome-wide association study of 107 phenotypes in *Arabidopsis thaliana* inbred lines. *Nature* **465**, 627-631 (2010).
4. Korves TM, *et al.* Fitness effects associated with the major flowering time gene FRIGIDA in *Arabidopsis thaliana* in the field. *Am Nat* **169**, E141-157 (2007).
5. Crawley. *Statistics: an introduction using R*. Wiley (2005).
